Noname manuscript No.  
(will be inserted by the editor)

---

1 **Unbiased emission factor estimators for large scale forest**  
2 **inventories: domain assessment techniques**

3 **Luca Birigazzi · Javier G. P. Gamarra ·**  
4 **Timothy G. Gregoire**

5  
6 Received: date / Accepted: date

7 **Abstract** Large scale forest inventories are often undertaken following a stratified ran-  
8 dom or systematic design. Yet the strata rarely correspond to the reporting areas of  
9 interest (domains) over which the country wants to report specific variables. The process  
10 is exemplified by a country aiming to use national forest inventory data to obtain aver-  
11 age biomass estimates per forest type for GHGI international reporting, where activity  
12 data (areas of land use or land use changes) and emission factors (carbon coefficients)  
13 are typically compiled from disparate sources and estimated using different sampling  
14 schemes. This study aims to provide a decision tree for the use of data obtained from  
15 forest surveys to draw conclusions about population sub-groups created after (and in-  
16 dependently of) the sample selection. While bias can arise whenever activity data and  
17 emission factors are calculated independently, it can be eliminated in case of a simple  
18 random or simple systematic design if properly weighted estimators are provided. This  
19 manuscript describes two unbiased estimators that can be used to estimate reporting-  
20 strata means, regardless of the sampling design adopted, and extends the result to the  
21 common situation in which the reporting-strata are spatially explicit, where a nested  
22 group estimator outperforms in terms of both bias and precision other more traditional  
23 estimators. From this estimator, an optimal sample allocation scheme is also derived.

24 **Keywords** emission factors · Forest Reference Levels · Greenhouse Gas Inventory ·  
25 National Forest Inventory · REDD+ · Survey sampling

---

Luca Birigazzi  
Forestry Department, FAO  
Viale delle Terme di Caracalla, 00153 Rome, Italy  
Tel.: +123-45-678910  
Fax: +123-45-678910  
E-mail: luca.birigazzi@fao.org

Javier G. P. Gamarra  
Forestry Department, FAO  
Viale delle Terme di Caracalla, 00153 Rome, Italy.

Timothy G. Gregoire  
School of Forestry and Environmental Studies  
Yale University, New Haven, CT 06511, USA

## 1 Introduction

Country-specific estimates of carbon coefficients (aka *emission factors*) are required to compile national greenhouse gas inventories (GHGI) under the United Nations Framework Convention on Climate Change (UNFCCC) and, in the context of REDD+, for developing Forest Reference Levels (FRLs) and for the reporting of REDD+ results-based actions. To this end, in order to account for emissions from land use, land use change and forestry (LULUCF), different emission factors have to be estimated for each of a number of land use categories and of various other land subpopulations, typically defined according to climatic zone, forest type or management practices (cf. IPCC 2003, 2006). Notice that these estimates are required to be unbiased and as precise as possible<sup>1</sup>.

IPCC tier 3 methods, which, if well implemented, are supposed to be the most certain and reliable, require these forest carbon coefficients to be obtained from national forest inventories (NFI). Due to the intrinsic variability of biomes and land uses in most of the countries, sampling designs for NFIs tend to rely on stratification as a first step to reduce uncertainties in emission estimates (Köhl et al 2006; Maniatis and Mollicone 2010). But the subpopulations for which the emission factors are needed might differ from those designated at the planning phase of the forest inventory. That is, the requested reporting units or areas of interest for the emission factors might be identified after the definition of the sampling design and/or after the data collection has been carried out. These targeted subpopulations are often called *domains of interest* in the statistical literature (Cochran 1977; Särndal et al 1992; Särndal and Lundström 2005; Köhl et al 2006; Gregoire and Valentine 2008; Mandallaz 2008; Lohr 2009; Schulz et al 2009; Thompson 2012). The lack of congruency between strata and domains usually results in a random and often small number of observations for each emission factor. The situation can be made even more complicated in the presence of complex forest inventory survey designs, often not optimized for all variables of interest involved in multipurpose inventories. In all these cases specific statistical approaches must be adopted in order to ensure that the estimates are precise and unbiased, very often requiring ancillary data or model-, rather than design-based inference (Schreuder et al 2004; Chambers 2011). Similar issues might arise whenever estimates of forest carbon are required not only at the national level, but also for certain provinces or districts of the country (Rao and Molina 2015).

Salient features of the estimation of emission factors for the LULUCF sector are that the domains are often defined spatially over a landscape and that their sizes are usually known but frequently obtained independently of the NFI. The emission factors, in this case, would consist of the average values of carbon or biomass for those specific areas. A detailed review of basic estimation methods for domains is provided in §10.3 of Särndal et al (1992). A compilation of domain estimators used for the analysis of the U.S.A. forest inventory data is presented in Bechtold and Patterson (2005) and for the Swiss National forest inventory by Mandallaz (2008).

Here we aim to provide an overall vision of the different domain estimation techniques applicable to derive LULUCF emission factors from large scale forest inventories. The focus here is particularly on NFI data which are often available to/in REDD+ countries.

---

<sup>1</sup> From IPCC (2003): “Estimates should be accurate in the sense that they are systematically neither over nor under true emissions or removals, so far as can be judged, and that uncertainties are reduced so far as is practicable”

**Table 1** definitions of weights and proportions

| Symbol   | Definition   |
|----------|--------------|
| $P_d$    | $N_d/N$      |
| $Q_d$    | $1 - P_d$    |
| $W_h$    | $N_h/N$      |
| $P_{hd}$ | $N_{hd}/N_h$ |
| $Q_{hd}$ | $1 - P_{hd}$ |
| $W_{hd}$ | $N_{hd}/N_d$ |
| $p_{hd}$ | $n_{hd}/n_h$ |
| $f_d$    | $n_d/N_d$    |
| $f_h$    | $n_h/N_h$    |

68 Our results apply both to cases in which domain sizes are estimated within or inde-  
 69 pendently of the NFI. In the case where the domains are known and spatially explicit  
 70 we also derive an unbiased estimator that improves the standard errors typically associ-  
 71 ated to classical  $\pi$ -weighted (i.e., Horwitz-Thompson) estimators, as well as the optimum  
 72 sampling sizes per stratum derived from this estimator. Finally, we propose a decision  
 73 tree, targeted particularly to countries aiming to report emission factor estimates from  
 74 national forest inventories, to select the most appropriate domain mean estimator.

## 75 2 General formulation for domain estimators

76 Let the population of interest be denoted by  $\mathcal{P}$ , and the size of  $\mathcal{P}$ , as measured by the  
 77 number of areal units of uniform size, be denoted by  $N$ , so that  $\mathcal{P} = \{u_1, \dots, u_k, \dots, u_N\}$ .  
 78 Let  $\mathcal{P}$  be partitioned into  $H$  non-overlapping subpopulations  $\mathcal{P}_1, \dots, \mathcal{P}_H$ . These will be  
 79 referred to as the sampling strata. Let  $N_h$  denote the size of  $\mathcal{P}_h$ , with  $h = 1, \dots, H$   
 80 such that  $N = \bigcup_{h=1}^H N_h$ . The population may also be partitioned alternately into  $D$   
 81 *reporting strata*, known widely in literature on survey sampling as *domains*, cf. Särndal  
 82 et al (1992, Chap. 10). To this end, let  $\mathcal{U}_d$  denote the  $d^{\text{th}}$  domain. Let  $N_d$  denote the  
 83 size of  $\mathcal{U}_d$ ,  $d = 1, \dots, D$  such that  $N = \bigcup_{d=1}^D N_d$  and let  $P_d = N_d/N$  denote the relative  
 84 size of the domain  $\mathcal{U}_d$  (Table 1). In this paper we address the estimation of the domain  
 85 averages,  $\bar{Y}_d$ , for some variable on interest indicated by  $Y$ . Implicit in the above is that  
 86 each population unit can be a member of a single sampling stratum and domain.

87 Let  $s_d$  define the part of the sample that happens to fall into  $\mathcal{U}_d$ , so that:  $s_d =$   
 88  $s \cap \mathcal{U}_d = \bigcup_{h=1}^H (s_h \cap \mathcal{U}_d)$ . Using results that are elaborated in §5.8, 7.6, and 10.3 of Särndal  
 89 et al (1992) (see also Cochran 1977; Mandallaz 2008; Thompson 2012), an approximately  
 90 design-unbiased estimator for the domain mean, whether or not the domain size is known,  
 91 is

$$\tilde{y}_{s_d} = \frac{\sum_{k \in s_d} \frac{y_k}{\pi_k}}{\hat{N}_d} \quad (1)$$

92 where  $\pi_k$  is the inclusion probability of the  $k^{\text{th}}$  unit  $u_k$ , and  $\hat{N}_d = \sum_{k \in s_d} \pi_k^{-1}$ .  
 93 The approximate variance of  $\tilde{y}_{s_d}$  is given by

$$AV(\tilde{y}_{s_d}) = \frac{1}{N_d^2} \sum_{k \in \mathcal{U}_d} \sum_{l \in \mathcal{U}_d} \Delta_{kl} \left( \frac{y_k - \bar{y}_{\mathcal{U}_d}}{\pi_k} \right) \left( \frac{y_l - \bar{y}_{\mathcal{U}_d}}{\pi_l} \right) \quad (2)$$

94 where  $\Delta_{kl} = \pi_{kl} - \pi_k \pi_l$  is the covariance between the *sample membership indicators*. An  
 95 estimator of  $AV(\tilde{y}_{s_d})$  is

$$\hat{V}(\tilde{y}_{s_d}) = \frac{1}{\hat{N}_d^2} \sum_{k \in s_d} \sum_{l \in s_d} \check{\Delta}_{kl} \left( \frac{y_k - \tilde{y}_{s_d}}{\pi_k} \right) \left( \frac{y_l - \tilde{y}_{s_d}}{\pi_l} \right). \quad (3)$$

96 where  $\check{\Delta}_{kl} = (\pi_{kl} - \pi_k \pi_l) \pi_{kl}^{-1}$ . Specific applications of these general formulas to the most  
 97 common sampling designs are provided in the next sections. The underlying assumption  
 98 is that the probability that  $s_d$  is empty is negligible.

99 In the following sections we will assess specific applications of these general formulas  
 100 to the most common sampling designs: simple random and stratified random sampling.

### 101 3 Simple Random Sampling

102 Let us consider the case in which a simple random sampling (SRS) is carried out on the  
 103 population  $\mathcal{P}$ . That is, a sample  $s$  of size  $n$  is randomly selected from  $\mathcal{P}$ . Let us define  $n_d$   
 104 the size of the sample falling in the domain  $\mathcal{U}_d$ . Under simple random sampling (where  
 105  $\pi_k = n/N$ ), given the event  $n_d > 0$ , the estimator  $\tilde{y}_{s_d}$  (Eq. (1)), is approximately design-  
 106 unbiased for the domain mean and corresponds to the domain sample mean, namely

$$\bar{y}_{s_d} = \frac{\sum_{k \in s_d} y_k}{n_d}. \quad (4)$$

107 However, when the probability that  $n_d = 0$  is not negligible, the bias of  $\bar{y}_{s_d}$  may be  
 108 substantial. The same result applies also to the case in which a systematic sampling  
 109 is carried out (with  $\pi_k = 1/a$ , where  $a$  is the sampling interval between successively  
 110 sampled units). From Eq. (2), the approximate variance of  $\bar{y}_{s_d}$  is

$$AV(\bar{y}_{s_d}) = \left( \frac{1}{n_d^0} - \frac{1}{N_d} \right) S_{\mathcal{U}_d}^2 \quad (5)$$

111 where  $n_d^0 = n_h \frac{N_d}{N}$  is the expected domain sample size and  $S_{\mathcal{U}_d}^2 = (N_d - 1)^{-1} \sum_{k \in \mathcal{U}_d} (y_k -$   
 112  $\bar{Y}_d)^2$  is the domain variance. Eq. (5), however, is likely to underestimate the variance of  
 113  $\bar{y}_{s_d}$ , due the fact that, under a simple random sampling, the domain sample size  $n_d$  is a  
 114 random variable, such that  $n_d \sim B(n_d^0, \frac{N_d}{N})$ . Each time a sample of size  $n$  is drawn from  
 115 the population, the number of sample units that fall in the domain  $\mathcal{U}_d$  might differ (or  
 116 even be zero). The random domain sample size results in a loss of precision, which is  
 117 inversely proportional to sample size  $n$  and to the domain proportion  $P_d$ . Conditioning  
 118 on  $n_d > 0$  provides a better approximation of the variance of  $\bar{y}_{s_d}$ , namely

$$AV^*(\bar{y}_{s_d}) = \left( \frac{1}{n_d^0} - \frac{1}{N_d} \right) \left( 1 + \frac{Q_d}{n_d^0} \right) S_{\mathcal{U}_d}^2, \quad (6)$$

119 where  $Q_d = 1 - P_d$ , considering binomial probabilities, as shown in §10.4 of Särndal et al  
120 (1992). Notice that Eq. (6) requires the domain size to be known.

121 The variance estimator in Eq. (3) becomes

$$\hat{V}(\bar{y}_{s_d}) = \left( \frac{1}{n_d} - \frac{1}{\hat{N}_d} \right) S_{s_d}^2 \quad (7)$$

122 where  $\hat{N}_d = Nn_d/n$  and  $S_{s_d}^2 = (n_d - 1)^{-1} \sum_{k \in s_d} (y_k - \bar{y}_{s_d})^2$  is the domain sample variance.

## 123 4 Stratified Random Sampling

124 Let us consider the case in which a stratified random sampling is carried out on the  
125 population  $\mathcal{P}$ , based on the  $H$  sampling-strata. That is, a probability sample  $s_h$ , of size  
126  $n_h$ , is independently selected from each  $\mathcal{P}_h$ , according to a design  $p_h(\cdot)$ . The total sample  
127 set, denoted as  $s$ , will be composed as:  $s = s_1 \cup s_2 \cdots \cup s_H$ .

128 Any stratum will intersect a certain number of domains. Let us define the intersection  
129 among the  $d^{\text{th}}$  domain and the  $h^{\text{th}}$  sampling-stratum as  $\mathcal{P}_h \cap \mathcal{U}_d = \{k : k \in \mathcal{P}_h \wedge k \in \mathcal{U}_d\}$   
130 and let  $N_{hd}$  denote the size of  $\mathcal{P}_h \cap \mathcal{U}_d$ . We can now define the following proportions:  
131  $W_h = N_h/N$ , which is the stratum weight,  $W_{hd} = N_{hd}/N_d$ , which is the intersection  
132 weight within the domain, and  $P_{hd} = N_{hd}/n_h$ , which is the relative size of the intersection  
133 within the stratum. The definitions of weights and proportion used in this paper are  
134 displayed in Table 1.

### 135 4.1 Bias of $\bar{y}_{s_d}$ under stratified designs

136 The arithmetic mean of  $Y$  for  $s_d$  (Eq. (4)) is certainly one of the simplest estimator of  
137 the domain mean, but it may be significantly biased under stratified random or stratified  
138 systematic designs (Pacifador Jr 1997). A notable exception is constituted by stratified  
139 designs with sample allocation proportional to the size of the strata (Holt and Smith  
140 1979). In this case the estimator  $\tilde{y}_{s_d}$  (Eq. (1)) corresponds to the arithmetic sample  
141 mean  $\bar{y}_{s_d}$  (Eq. (4)), as long as  $n \gg 0$ , to avoid spurious rounding off effects due to  
142 limited allocated sample size. In general, under stratified designs, the magnitude of the  
143 bias of  $\bar{y}_{s_d}$  will depend on the allocation of the sample units among the strata and on  
144 the homogeneity of the domains (Kish 1980). The development for the quantification of  
145 bias in domains under stratified random designs is provided in Appendix A).

### 146 4.2 Estimators under unknown domain size

147 Let denote  $s_{hd}$  the intersection of the domain  $\mathcal{U}_d$  and the sample drawn in the stratum  
148  $\mathcal{P}_h$ , and  $n_{hd}$  denote the size of this subsample. Under a stratified random sampling, with  
149  $H$  strata intersecting  $D$  domains, Eq. (1) can be written as:

$$\tilde{y}_{s_d} = \hat{y}_{s_d} = \frac{\sum_{h=1}^H \frac{N_h}{n_h} \sum_{k \in s_{hd}} y_k}{\sum_{h=1}^H \frac{N_h}{n_h} n_{hd}}, \quad (8)$$

150 as shown in Särndal et al (1992, example 10.3.3).

151 Let us call  $\tilde{y}_{s_d}$  in Eq. (8)  $\pi$ -estimator. It might be informative to re-define the right-  
152 hand side of Eq. (8) as

$$\tilde{y}_{s_d} = \frac{N \sum_{h=1}^H W_h p_{hd} \bar{y}_{hd}}{N \sum_{h=1}^H W_h p_{hd}}, \quad (9)$$

153 where  $\bar{y}_{hd} = n_{hd}^{-1} \sum_{k \in s_{hd}} y_k$  is the arithmetic mean in  $s_{hd}$ . This reformulation makes  
154 more explicit that  $\tilde{y}_{s_d}$  is the ratio of an estimator of the population total of  $y$  in  $\mathcal{U}_d$  to  
155 an estimator of  $N_d$ .

156 An estimator of the variance of  $\tilde{y}_{s_d}$  is

$$V(\tilde{y}_{s_d}) = \frac{1}{\hat{N}_d^2} \sum_{h=1}^H N_h^2 \frac{1 - f_h}{n_h} \frac{\sum_{k \in s_{hd}} (y_k - \bar{y}_{s_{hd}})^2 + n_{hd}(1 - p_{hd})(\bar{y}_{s_{hd}} - \hat{y}_{s_d})^2}{n_h - 1}, \quad (10)$$

157 where  $\hat{N}_d = \sum_{h=1}^H \frac{n_{hd}}{n_h} N_h$ , as in Särndal et al (1992, example 10.3.3).

### 158 4.3 Estimators under known domain size

#### 159 *Spatially explicit domains: a nested group estimator*

160 In situations in which it is possible to classify each population unit into a domain, so  
161 that the size  $N_{hd}$  of each intersection is known, we propose an alternative estimator  
162 of domain means. In these cases, an unbiased estimator of the mean of the domain  $\mathcal{U}_d$   
163 can be obtained considering the domain  $\mathcal{U}_d$  itself divided into further strata, given by  
164 its intersections with the sampling-strata, (which are  $\mathcal{U}_d \cap \mathcal{P}_1, \dots, \mathcal{U}_d \cap \mathcal{P}_H$ ), so that  
165  $\mathcal{U}_d = \bigcup_{h=1}^H (\mathcal{P}_h \cap \mathcal{U}_d)$ , and subsequently applying the usual stratified sampling estimator.  
166 The weight of each “nested stratum” is given by the ratio of the size of the intersection  
167 to the total size of the domain. This estimator for the mean of the domain  $\mathcal{U}_d$  is  $\bar{y}_d^{NG}$   
168 (*NG* for *nested group*):

$$\bar{y}_d^{NG} = \sum_{h=1}^H W_{hd} \tilde{y}_{s_{hd}} = \frac{1}{N_d} \sum_{h=1}^H N_{hd} \tilde{y}_{s_{hd}} \quad (11)$$

169 where  $W_{hd} = N_{hd}/N_d$  and

$$\tilde{y}_{s_{hd}} = \frac{\sum_{k \in s_{hd}} \frac{y_k}{\pi_k}}{\hat{N}_{hd}} \quad (12)$$

170 is the  $\pi$ -weighted intersection sample mean, with  $\hat{N}_{hd} = \sum_{k \in s_{hd}} \pi_k^{-1}$ . Eq. (11) is a  
171 special case of the post-stratified domain estimator (cf. Särndal et al 1992, Eq. 10.7.4  
172 and Remark 10.7.3) for stratified designs, in which the strata are used as post-strata.

173 If a random or systematic sample has been selected in each stratum, the estimator  
174  $\tilde{y}_{s_{hd}}$  in Eq. (12) is identical to the arithmetic sample mean  $\bar{y}_{s_{hd}} = (\sum_{k \in s_{hd}} y_k)/n_{hd}$ , and  
175 Eq. (11) becomes

$$\bar{y}_d^{NG} = \frac{1}{N_d} \sum_{h=1}^H \frac{N_{hd} \sum_{k \in s_{hd}} y_k}{n_{hd}} \quad (13)$$

176 It is worthwhile to notice that  $\bar{y}_d^{NG}$  requires  $n_{hd} > 0$ , while the  $\pi$ -estimator - Eq. (9) -  
 177 requires only  $n_h > 0$ .

178 As in the previous development in §4.2, it is informative to re-define the right-hand  
 179 side of Eq. (13), which simplifies further into:

$$\bar{y}_d^{NG} = \frac{N \sum_{h=1}^H W_h P_{hd} \bar{y}_{hd}}{N_d}, \quad (14)$$

180 because it makes more evident that, unlike Eq. (9),  $\bar{y}_d^{NG}$  is not a ratio of two estimators,  
 181 but rather a ratio of an estimator of the domain total to the actual size of the domain.  
 182 Notice also that the sample estimator  $p_{hd}$  in the numerator of (9) is substituted here by  
 183 the known value of the relative size  $P_{hd}$ .

184 The variance of  $\bar{y}_d^{NG}$  is

$$V(\bar{y}_d^{NG}) = \sum_{h=1}^H W_{hd}^2 V(\tilde{y}_{s_{hd}}) = \frac{1}{N_d^2} \sum_{h=1}^H (N_{hd}^2 V(\tilde{y}_{s_{hd}})), \quad (15)$$

185 where  $V(\tilde{y}_{s_{hd}})$  is the variance of the estimator  $\tilde{y}_{s_{hd}}$ .

186 If a random sample has been selected in each stratum,  $V(\tilde{y}_{s_{hd}})$  can be re-expressed  
 187 by analogy to Eq. (6) as

$$V_{SRS}(\bar{y}_d^{NG}) = \frac{1}{N_d^2} \sum_{h=1}^H \left( N_{hd}^2 \left( \frac{1}{n_{hd}^0} - \frac{1}{N_{hd}} \right) \left( 1 + \frac{Q_{hd}}{n_{hd}^0} \right) S_{hd}^2 \right) \quad (16)$$

188 where  $n_{hd}^0 = n_h P_h$  is the expected domain intersection sample size,  $Q_{hd} = 1 - P_h$  and  
 189  $S_{hd}^2 = (N_{hd} - 1)^{-1} \sum_{k \in (\mathcal{U}_d \cap \mathcal{P}_h)} (y_k - \bar{y}_{hd})^2$  is the intersection variance.

190 By analogy to Eq. (7), an estimator of  $V_{SRS}(\bar{y}_d^{NG})$  is

$$\hat{V}_{SRS}(\bar{y}_d^{NG}) = \frac{1}{N_d^2} \sum_{h=1}^H N_{hd}^2 \left( \frac{1}{n_{hd}} - \frac{1}{\hat{N}_{hd}} \right) S_{s_{hd}}^2 \quad (17)$$

191 where  $S_{s_{hd}}^2 = (n_{hd} - 1)^{-1} \sum_{k \in s_{hd}} (y_k - \bar{y}_{s_{hd}})^2$  is the intersection sample variance and  
 192  $\hat{N}_{hd} = N_h p_{hd}$ . It is worthwhile to notice that (17) requires at least  $n_{hd} \geq 2$  to allow  $S_{s_{hd}}^2$   
 193 to be calculated.

194 The considerations regarding the sample size of the post-stratified estimator also  
 195 apply to Eq. (11). That is, none of the intersection sample sizes  $n_{hd}$  should be too  
 196 small. Särndal et al (1992, Remark 10.7.2) suggests a minimum sample size of at least  
 197 10 observations in each intersection.

#### 198 *Relative precision of the nested group and $\pi$ - estimators*

199 Under stratified random sampling the approximate variance of the  $\pi$ -estimator shown in  
 200 Eq. (2) takes the form

$$AV^*(\tilde{y}_{s_d}) = \frac{1}{N_d^2} \sum_{h=1}^H \left( N_{hd}^2 \left( \frac{1}{n_{hd}^0} - \frac{1}{N_{hd}} \right) \left( 1 + \frac{Q_{hd}}{n_{hd}^0} \right) \left( S_{hd}^2 + Q_{hd} (\bar{y}_{\mathcal{U}_d} - \bar{y}_{hd})^2 \right) \right) \quad (18)$$

201 A proof is provided in the Appendix B.

202 The variance of the nested group estimator is

$$AV^*(\tilde{y}_d^{NG}) = \frac{1}{N_d^2} \sum_{h=1}^H \left( N_{hd}^2 \left( \frac{1}{n_{hd}^0} - \frac{1}{N_{hd}} \right) \left( 1 + \frac{Q_{hd}}{n_{hd}^0} \right) S_{hd}^2 \right) \quad (19)$$

203 which implies that  $AV^*(\tilde{y}_{s_d}) \geq AV^*(\tilde{y}_d^{NG})$  always. The smaller the domain and the larger  
204 the differences among the strata means, the larger the gain in precision due to the use of  
205 the nested group estimator is. The drawback is that the nested group estimator is more  
206 *demanding* in terms of sample size, as it requires to have at least one sample in each  
207 intersection  $\mathcal{P}_h \cap \mathcal{U}_d$ .

208 The minimum of the  $V(\tilde{y}_d^{NG})$  for a certain domain  $\mathcal{U}_d$ , given a fixed total sample size  
209  $n$ , is obtained when:

$$n_h \approx \frac{W_{hd} S_{hd} / \sqrt{P_{hd}}}{\sum_{i=1}^H W_{id} S_{id} / \sqrt{P_{id}}} \quad (20)$$

210 Eq. (20) corresponds to the approximate optimum allocation for the nested estimator for  
211 the domain  $\mathcal{U}_d$  (cf. Cochran 1977, Chap.5), and contrasts to the traditionally used  
212 Neyman optimum allocation for stratified random sampling (Neyman 1934):

$$n_h \approx \frac{W_{hd} S_{hd}}{\sum_{i=1}^H W_{id} S_{id}} \quad (21)$$

213 A proof on the development of Eq. (20) is provided in Appendix C.

## 214 5 Numerical tests of estimators

215 The properties of the above mentioned estimators were examined in a simulation study.  
216 We chose here a spatially explicit domain subject to stratified systematic sampling. Let  
217 us consider a population  $\mathcal{P}$  consisting of 320 non-overlapping square units each with  
218 area 1 ha labeled  $k = 1, \dots, 320$ , so that  $\mathcal{P} = \{u_1, \dots, u_k, \dots, u_{320}\}$ . The population  $\mathcal{P}$  is  
219 partitioned into 2 strata  $a$  and  $b$ , of size 150 and 170 ha, respectively. Let  $Y$  be the variable  
220 of interest. Values of  $Y$  have been randomly assigned, according to a normal distribution  
221 with mean and variance parameters as described in Table 2, to each population unit in  
222 the 2 strata. Further, let us assume that a random stratified sample  $s$  of size 35 has to be  
223 drawn without replacement from the population based on the two strata  $a$  and  $b$ . That  
224 is, a random sample  $s_a$  of size  $n_a$  has to be selected from the stratum  $a$  and a random  
225 sample  $s_b$  of size  $n_b$  from the stratum  $b$ , so that  $n_a + n_b = 35$ . The population has also  
226 been partitioned into 2 domains,  $A$  and  $B$ , of size 96 and 224 ha, respectively (Fig. 1).  
227 Population statistics are displayed in Table 2.

228 The domain averages  $\bar{Y}_A$  and  $\bar{Y}_B$  were estimated from the sample  $s$ . The number  
229 of plots selected in strata  $a$  and  $b$  had not been initially defined and 16 different plot  
230 allocation strategies has been tested, with  $n_a \in (10, 25)$  and  $n_b = n - n_a$ . For each  
231 allocation  $10^5$  independent sample replicates of  $n = 35$  were drawn and from each of  
232 those samples the domain means were estimated. Given the large number of samples and  
233 allocation regimes, we simulated parallel code with the package `doParallel` (Revolution



**Table 2** Statistics of strata and domains used in the simulation study

| Population total   |                    |
|--------------------|--------------------|
| $N = 320$          |                    |
| $s = 35$           |                    |
| strata             | domains            |
| $N_a = 150$        | $N_A = 96$         |
| $N_b = 170$        | $N_B = 224$        |
| $\bar{Y}_a = 15.6$ | $\bar{Y}_A = 19$   |
| $\bar{Y}_b = 24$   | $\bar{Y}_B = 20.5$ |
| $S_a^2 = 26.6$     | $S_A^2 = 36.1$     |
| $S_b^2 = 13.9$     | $S_B^2 = 36.9$     |

234 Analytics and Weston 2015) in R (R Core Team 2016), using a cluster of 16 CPU and 30  
235 GB of RAM provided by the FAO-hosted SEPAL platform (SEPAL 2016). We contrasted  
236 the following estimators:

- 237 1. the domain sample arithmetic mean, Eq. (4)
- 238 2. the  $\pi$ -estimator, Eq. (9)
- 239 3. the nested group estimator, Eq. (14)

240 The means of the  $10^5$  sample replicates, estimates for the 2 domains for each plot allo-  
241 cation and for each estimator are presented in Fig. 2.

242 As expected, the arithmetic sample mean proves biased, whenever the sample alloca-  
243 tion is far from being proportional to the strata size (which corresponds to the allocation  
244 “16-19”).  $\tilde{y}_{sd}$  and  $\tilde{y}_d^{NG}$  are approximately unbiased. The MSE is defined as the sum of  
245 the variance and the squared bias. In our example, the nested group estimate presents  
246 smaller MSE than the  $\pi$ -weighted estimate in all allocation scenarios (Fig. 3), and both  
247 always smaller than the MSE for the arithmetic mean. The numerically obtained opti-  
248 mum allocation strategy, would correspond to “22-13” ( $\pi$ -weighted) *vs.* “19-16” (nested  
249 group) when minimizing MSE for the “A” domain mean, and “21-14” for both estimators  
250 in the MSE minimization of the “B” domain.

251 Only by teasing apart the two components of the MSE, however, can one disentangle  
252 the role of bias and precision in each of the estimates. This becomes particularly relevant  
253 for REDD+ countries aiming to follow IPCC (2003) guidelines, recommending the min-  
254 imization of uncertainty (i.e., precision) as much as possible. Precision (i.e., variance)  
255 estimates in the numerical tests show that  $V(\tilde{y}_d^{NG})$  is always smaller than  $V(\tilde{y}_{sd})$  (Fig.4).  
256 However, the arithmetic mean presents smaller variance values in those allocation strate-  
257 gies far from the optimum. Minimum variances for both  $\pi$ -weighted and nested group  
258 estimators match the MSE values and indicate that for these two estimators the vast  
259 majority of the MSE is due to variance (and hence, reinforcing the unbiasedness of these  
260 two estimators).

## 261 6 Discussion

262 The amount of information which large-scale environmental surveys (such as national  
263 forest inventories) are expected to produce has considerably increased over time (Mc-  
264 Donald 2003). In the case of GHG emissions reporting, this expectation might include

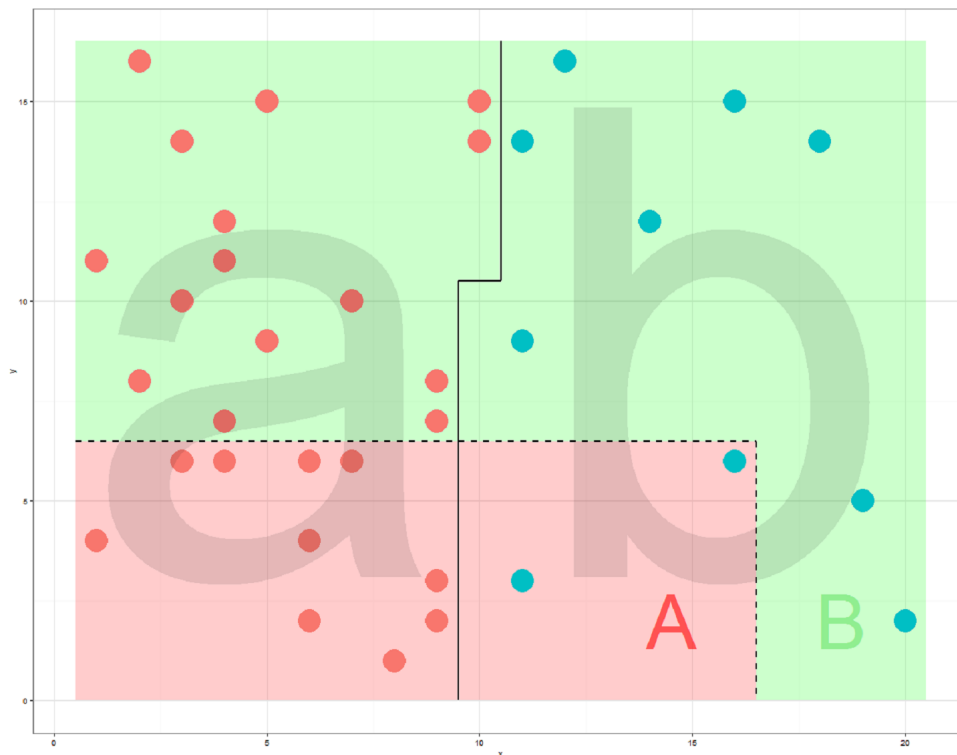

**Fig. 1** The area of study consists of a rectangular region of 320 ha, subdivided into 320 non-overlapping square areas of 1 hectare. Sampling- strata *a* and *b* are divided by the solid line, while domains *A*, in red and *B*, in green are divided by the dotted line. For illustration purposes, a simple random sample is shown here independently drawn from each sampling-stratum, with allocation not proportional to the size of the strata (in this a particular allocation  $n_a = 25$ , red dots, and  $n_b = 10$ , blue dots).

265 the production of estimates for a certain number of domains of interest (such as land use  
266 categories) (Tubiello et al 2014), often identified after and independently of the forest  
267 inventory (IPCC 2003). But obtaining accurate and unbiased estimates for such do-  
268 mains is often a non trivial exercise, especially in the presence of complex survey designs  
269 (Lehtonen and Pahkinen 2004).

270 Thus, when the domains are spatially explicit (i.e. each population unit is classified  
271 into a domain) and all the forest inventory sample units geo-referenced, it is always  
272 possible to assign automatically each of  $n$  sample units into a domain  $\mathcal{U}_d$ , even when the  
273 information regarding the domains was not collected during the NFI. Often, however,  
274 the domains might not be spatially explicit and their sizes might have been estimated  
275 independently of the forest inventory, such as, for example, through an external, ancillary  
276 sample-based land use survey with a different sampling design. This can occur frequently  
277 during the preparation of a GHGI report, where activity data (areas of land use or land  
278 use changes) and emission factors (i.e., biomass, volume,..) are typically compiled from  
279 disparate sources. This method for the representation of land in tabular form falls within

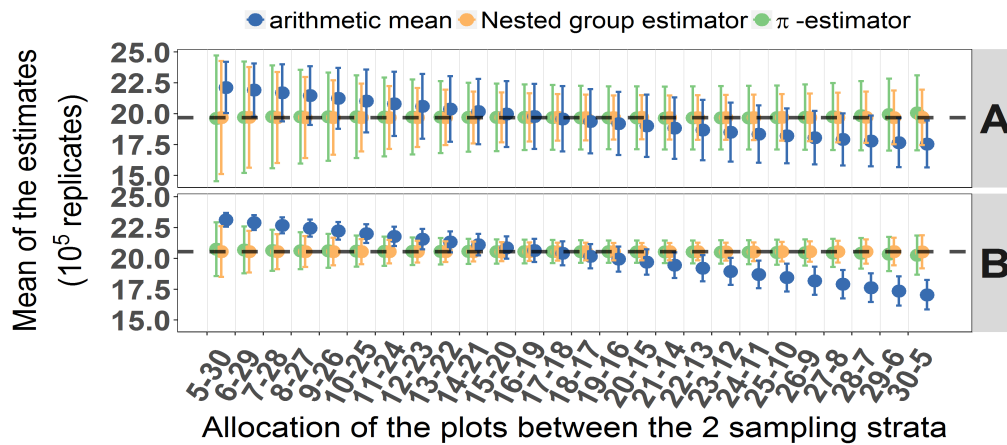

**Fig. 2** Means of the estimates for the domains *A* and *B*, by allocation and estimator. The grey dashed horizontal line is the real mean of the domains

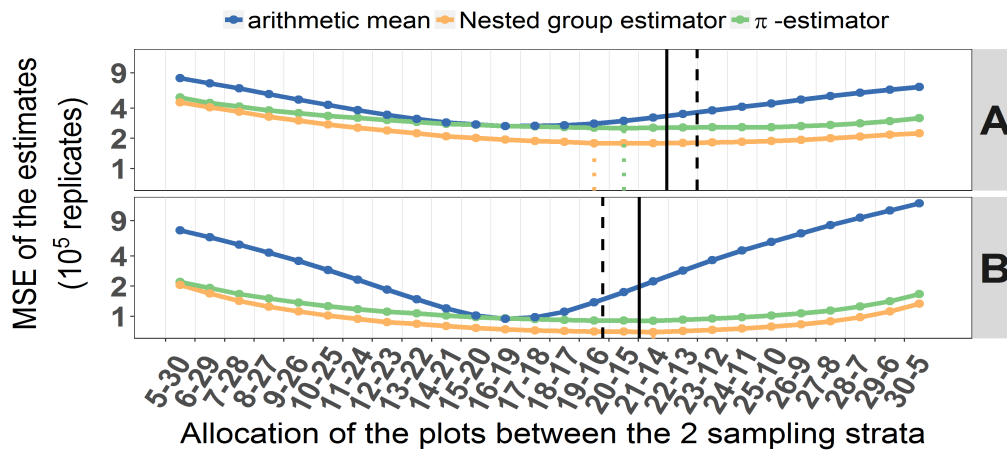

**Fig. 3** Mean squared errors of the estimates for the domains *A* and *B*, by allocation and estimator. Dotted green and orange vertical lines reflect the allocations at which the MSE of the domain mean is minimized in the  $\pi$ - vs. nested group estimators, respectively. Black solid and dashed vertical lines correspond to nested group (Eq. (20)) vs. Neyman (Eq. (21)) theoretical optimum allocations. The y-axis is log-transformed for better visualization.

280 the IPCC definitions of *approach 1* and *approach 2*, as described in IPCC (2003, Chap.  
 281 2) and IPCC (2006, Vol. 4, Chap. 3), and it is widely used for the estimation of land  
 282 use and land use changes. An example of this is the case in which the absolute sizes of  
 283 land use categories are independently estimated through visual (or augmented visual)  
 284 interpretation of a sample of remote imagery (Bey et al 2016).

285 In this case, in order to estimate the domain averages it is first of all necessary to  
 286 classify each of the  $n$  forest inventory sample units into one of the spatially-implicit

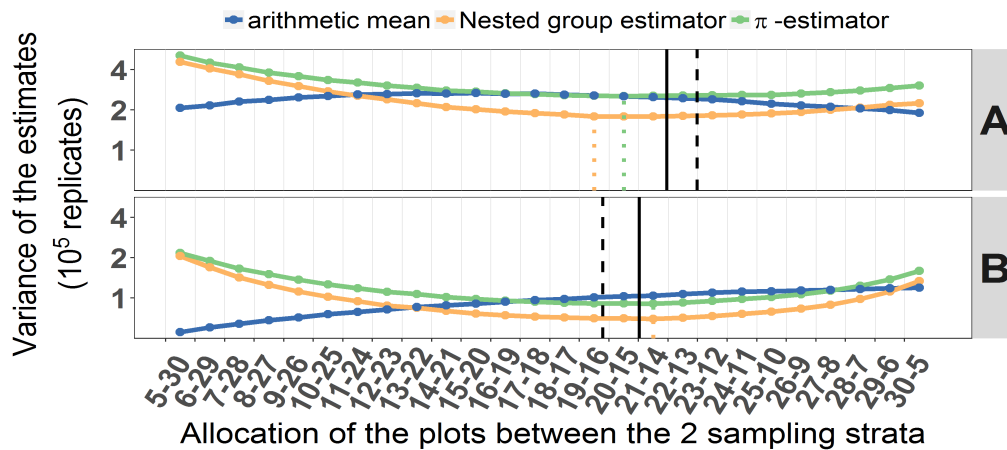

**Fig. 4** Variance of the estimates for the domains *A* and *B*, by allocation and estimator. Dotted green and orange vertical lines reflect the allocations at which the variance of the domain mean is minimized in the  $\pi$ - vs. nested group estimators, respectively. Black solid and dashed vertical lines as in Fig. 3. The y-axis is log-transformed for better visualization.

287 domains  $\mathcal{U}_d$ . To prevent any possible bias, re-classification needs to be done using the  
 288 same methodology adopted to estimate the domain sizes. If, for example, these have been  
 289 estimated through sample-based visual interpretation, then the  $n$  sample units need to  
 290 be interpreted using the same type of imagery and, possibly, the same interpreters of the  
 291 land use survey. The domain mean estimator to be used is the estimator  $\tilde{y}_{s_d}$  in Eq. (1),  
 292 which under a simple random or systematic sampling corresponds to the domain sample  
 293 mean Eq. (4) and under a stratified random or stratified systematic sampling takes the  
 294 form of Eq. (9).

295 In an attempt to offer a set of rules for the selection of adequate domain estimators, we  
 296 propose a decision tree (Fig. 5) that aims to guide forestry academics and NFI assessment  
 297 teams through each step depending on:

- 298 1. the stratified nature of the NFI design
- 299 2. the ancillary nature of the domain sizes
- 300 3. whether the domains are spatially implicit or explicit
- 301 4. whether the sampling (per stratum) is SRS or systematic

302 Overall,  $\pi$ -weighted estimators should be considered whenever the sampling per stra-  
 303 tum ( $\forall H \geq 1$ ) does not follow SRS or systematic designs, or else when the domains  
 304 are spatially implicit and independently estimated. Under a SRS or systematic design,  
 305 when  $H = 1$  or  $H > 1$  the domain sample mean Eq. (4) or Eq. (9) are recommended,  
 306 respectively. Finally, if  $H > 1$ , domain sizes are independent from the NFI and spatially  
 307 explicit, nested group estimators outperform the others, using the  $\pi$ -weighted version  
 308 (Eq. (11)) if the per stratum samples were not SRS or systematically taken.

309 The use of nested estimators, thus, should ideally be known in order to facilitate  
 310 allocation strategies previous to the design of the forest inventory. Notice that Eq. (20)  
 311 keeps a striking similarity to the optimal allocation equation of Cochran (1977, p. 98)

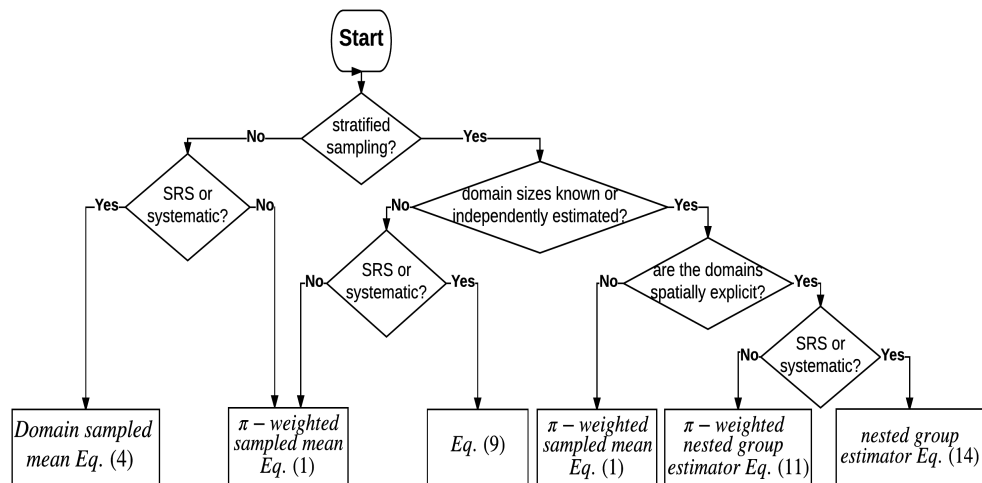

**Fig. 5** Decision tree for the selection of the adequate domain mean estimator

312 (Schreuder et al 1993). But instead, variables per stratum  $h$  are accounted on a per  
 313 stratum/domain intersection  $hd$ , and Cochran's costs of sampling a unit in stratum  $h$  are  
 314 replaced by  $P_{hd}$ . Hence, when the stratum is filled by the domain,  $P_{hd} = 1$  and optimum  
 315 allocation corresponds to Neyman's (21). Otherwise,  $P_{hd} < 1$  will effectively rescale the  
 316 weight assigned to individual sampling units in the stratum, akin to a reduction in cost  
 317 per sampling unit.

318 In the simulation exercise, Eq. (20) outperforms Neyman's Eq. (21) for both do-  
 319 mains as references. However, it is still an approximation, as shown in Appendix C,  
 320 largely driven by the limitations imposed in the exercise, when  $n_h$  is small. Although  
 321 the situation under which the application of nested group estimators and the nested  
 322 group optimal allocation strategy might seem rare, many countries find themselves in  
 323 practice conducting international reporting where per ha. emission factors are calculated  
 324 from stratified inventories, and the calculation of domain sizes comes from independent,  
 325 spatially explicit sources. As shown above, this is where nested group estimators may  
 326 provide opportunities to reduce both bias and sampling error, outperforming not only  
 327 the often misused domain arithmetic means, but also the classical unbiased  $\pi$ -weighted  
 328 estimators.

329 While the nested group approach might seem the ideal one given its performance  
 330 in our example, it is subject to several assumptions that often may not be as realistic.  
 331 First,  $n_{hd} \geq 2$  is a necessary condition to obtain a measure of precision; second, and  
 332 most important, domain sizes are assumed to be error-free. This assumption, although  
 333 often taken, is far from realistic, since spatially explicit obtained information always con-  
 334 tains errors, even if only sampling ones. Despite this last assumption, most international  
 335 reporting so far from countries to the UNFCCC has been known to observe it, at least

336 for static pictures (i.e., area changes are calculated with their errors). In such a case, the  
337 use of nested estimators might be the best option for REDD+ reporting.

338 **Acknowledgements** The authors want to thank specially Becky Tavani and Julian Fox from the  
339 Forestry Department in FAO, and the whole UN-REDD program for their insights and continuous  
340 support in the preparation of this document.

## 341 Appendices

### 342 A The bias of the domain sample mean under a random stratified sampling

343 Similarly to §4, let us consider the case in which a stratified random sampling is carried  
 344 out on the population  $\mathcal{P}$ , based on the  $H$  sampling-strata. Let denote  $s_{hd}$  the intersection  
 345 of the domain  $\mathcal{U}_d$  and the sample drawn in the sampling-stratum  $\mathcal{P}_h$ , and  $n_{hd}$  the size  
 346 of this sub-sample. The mean of  $Y$  for  $s_d$  can be written as:

$$\bar{y}_{s_d} = \frac{\sum_{h=1}^H \sum_{k \in s_{hd}} y_k}{n_d} = \frac{\sum_{h=1}^H n_{hd} \bar{y}_{s_{hd}}}{n_d} \quad (22)$$

347 where  $\bar{y}_{s_{hd}}$  is the sample mean of the sample drawn in the in the stratum  $\mathcal{P}_h$ , and  
 348 belonging to the domain  $\mathcal{U}_d$ . The number  $n_{hd}$  of sample units falling into  $\mathcal{P}_h \cap \mathcal{U}_d$  varies  
 349 depending on the sampling strategy and on the sample allocation adopted. If a simple  
 350 random or systematic sample is taken in each sampling-stratum the expected value of  
 351 the number of units  $n_{hd}$  that are in  $s_d$  is given by:

$$E(n_{hd}) = W_{hd} n_h = N_{hd} f_h \quad (23)$$

352 where  $W_{hd} = N_{hd}/N_h$  is the relative size of the intersection  $\mathcal{P}_h \cap \mathcal{U}_d$  within the stratum  
 353  $\mathcal{P}_h$ . The expected value of the number of sample units  $n_d$  that happen to fall into the  
 354 domain  $\mathcal{U}_d$  can be expressed as a linear function of the expected number of sample units  
 355 in each intersection:

$$E(n_d) = \sum_{h=1}^H E(n_{hd}) = \sum_{h=1}^H W_{hd} n_h \quad (24)$$

356 Denote by  $A_d$  the event  $E(n_d) \geq 1$ . If  $n$  is large enough  $Pr(A_d)$  is close to 1. Under  
 357 the condition  $A_d$ , the expected value of  $\bar{y}_{s_d}$  for the domain  $\mathcal{U}_d$  is given by

$$E(\bar{y}_{s_d} | A_d) = \frac{\sum_{h=1}^H W_{hd} n_h \bar{Y}_{hd}}{\sum_{h=1}^H W_{hd} n_h} \quad (25)$$

358 We will now assume that  $A_d$  will certainly occur. Since the population mean of the  
 359 domain  $\mathcal{U}_d$  can be written as:

$$\bar{Y}_d = \frac{\sum_{h=1}^H N_{hd} \bar{Y}_{hd}}{N_d} \quad (26)$$

360 the bias of the arithmetic mean  $\bar{y}_{s_d}$  for the domain  $\mathcal{U}_d$  therefore amounts to:

$$BIAS(\bar{y}_{s_d}) = E(\bar{y}_{s_d}) - \bar{Y}_d = \frac{\sum_{h=1}^H W_{hd} n_h \bar{Y}_{hd}}{\sum_{h=1}^H W_{hd} n_h} - \frac{\sum_{h=1}^H N_{hd} \bar{Y}_{hd}}{N_d} \quad (27)$$

361 Under a stratified random sampling with a sample allocation proportional to the size of  
 362 the strata, where  $n_h = nN_h/N = N_h f$ , the arithmetic mean proves unbiased since

$$E(\bar{y}_{s_d}) = \frac{\sum_{h=1}^H W_{hd} N_h f \bar{Y}_{hd}}{\sum_{h=1}^H W_{hd} N_h f} = \frac{\sum_{h=1}^H N_{hd} \bar{Y}_{hd}}{\sum_{h=1}^H N_{hd}} = \frac{\sum_{h=1}^H N_{hd} \bar{Y}_{hd}}{N_d} = \bar{Y}_d \quad (28)$$

363 **B A better approximation of the variance of the  $\pi$ -estimator under a**  
 364 **stratified random sampling**

365 Under a random stratified sampling with  $H$  strata, indexed with the letter  $h$ , (where  
 366  $h = 1, \dots, H$ ), (2) can be re-expressed as

$$AV(\tilde{y}_{s_d}) = \frac{1}{N_d^2} \sum_{h=1}^H \left( \frac{\Delta_{kl}}{\pi_k^2} \left[ \sum_{k \in (\mathcal{P}_h \cap \mathcal{U}_d)} (y_k - \bar{y}_{\mathcal{U}_d}) \right]^2 - \frac{\Delta_{kl} - \Delta_{kk}}{\pi_k^2} \sum_{k \in (\mathcal{P}_h \cap \mathcal{U}_d)} (y_k - \bar{y}_{\mathcal{U}_d})^2 \right) \quad (29)$$

367 and

$$\Delta_{kl} = \begin{cases} \frac{n_h}{N_h} \left(1 - \frac{n_h}{N_h}\right), & \text{for } k = l, \text{ (we can call it } \Delta_{kk}\text{)} \\ \frac{n_h(N_h - n_h)}{N^2(N_h - 1)}, & \text{for } k \neq l \text{ and } k, l \text{ belonging to the same stratum} \\ 0, & \text{for } k \neq l \text{ and } k, l \text{ belonging to a different stratum} \end{cases} \quad (30)$$

368 therefore

$$AV(\tilde{y}_{s_d}) = \frac{1}{N_d^2} \sum_{h=1}^H \left( \frac{N_h - n_h}{n_h(N_h - 1)} \right) \left( N_h \sum_{k \in (\mathcal{P}_h \cap \mathcal{U}_d)} (y_k - \bar{y}_d)^2 - \left[ \sum_{k \in (\mathcal{P}_h \cap \mathcal{U}_d)} (y_k - \bar{y}_d) \right]^2 \right) \quad (31)$$

decomposing the variance we obtain:

$$AV(\tilde{y}_{s_d}) = \frac{1}{N_d^2} \sum_{h=1}^H \left( \frac{N_h - n_h}{n_h(N_h - 1)} \right) \left( N_h \left[ \sum_{k \in (\mathcal{P}_h \cap \mathcal{U}_d)} (y_k - \bar{y}_{hd})^2 + N_{hd}(\bar{y}_{\mathcal{U}_d} - \bar{y}_{hd})^2 \right] - \left[ \sum_{k \in (\mathcal{P}_h \cap \mathcal{U}_d)} (y_k - \bar{y}_{hd}) + N_{hd}(\bar{y}_{\mathcal{U}_d} - \bar{y}_{hd}) \right]^2 \right) \quad (32)$$



hence

$$\begin{aligned}
 AV(\tilde{y}_{s_d}) &= \frac{1}{N_d^2} \sum_{h=1}^H \left( \frac{N_h - n_h}{n_h(N_h - 1)} \right) \\
 &\quad \left( N_h \left[ \sum_{k \in (\mathcal{P}_h \cap \mathcal{U}_d)} (y_k - \bar{y}_{hd})^2 + N_{hd}(\bar{y}_{\mathcal{U}_d} - \bar{y}_{hd})^2 \right] - [N_{hd}(\bar{y}_{\mathcal{U}_d} - \bar{y}_{hd})]^2 \right) = \\
 &\quad \frac{1}{N_d^2} \sum_{h=1}^H \left( \frac{N_h - n_h}{n_h(N_h - 1)} \right) \\
 &\quad \left( N_h \sum_{k \in (\mathcal{P}_h \cap \mathcal{U}_d)} (y_k - \bar{y}_{hd})^2 \frac{N_{hd} - 1}{N_{hd} - 1} + N_{hd}(\bar{y}_{\mathcal{U}_d} - \bar{y}_{hd})^2 (N_h - N_{hd}) \right) = \\
 &\quad \frac{1}{N_d^2} \sum_{h=1}^H \left( \frac{N_h - n_h}{n_h(N_h - 1)} \right) \left( N_h(N_{hd} - 1)S_{hd}^2 + N_{hd}(\bar{y}_{\mathcal{U}_d} - \bar{y}_{hd})^2 (N_h - N_{hd}) \right) = \\
 &\quad \frac{1}{N_d^2} \sum_{h=1}^H \left( \frac{N_h - n_h}{n_h} \right) \left( N_h P_{hd} S_{hd}^2 + P_{hd}(\bar{y}_{\mathcal{U}_d} - \bar{y}_{hd})^2 (N_h - N_{hd}) \right) = \\
 &\quad \frac{1}{N_d^2} \sum_{h=1}^H \left( \frac{1 - f_h}{f_h} \right) \left( N_h P_{hd} S_{hd}^2 + P_{hd}(\bar{y}_{\mathcal{U}_d} - \bar{y}_{hd})^2 (N_h - N_{hd}) \right) = \\
 &\quad \frac{1}{N_d^2} \sum_{h=1}^H \left( \frac{1 - f_h}{n_h} \right) \left( N_h^2 P_{hd} S_{hd}^2 + P_{hd}(\bar{y}_{\mathcal{U}_d} - \bar{y}_{hd})^2 (N_h^2 - N_{hd} N_h \frac{N_h}{N_h}) \right) = \\
 &\quad \frac{1}{N_d^2} \sum_{h=1}^H \left( \frac{1 - f_h}{n_h} \right) \left( N_h^2 P_{hd} S_{hd}^2 + P_{hd}(\bar{y}_{\mathcal{U}_d} - \bar{y}_{hd})^2 N_h^2 Q_{hd} \right) = \\
 &\quad \frac{1}{N_d^2} \sum_{h=1}^H \left( N_h^2 \frac{1 - f_h}{n_h} P_{hd} \left( Q_{hd}(\bar{y}_{\mathcal{U}_d} - \bar{y}_{hd})^2 + S_{hd}^2 \right) \right) \quad (33)
 \end{aligned}$$

369 where  $P_{hd} = \frac{N_{hd}}{N_h}$ ,  $Q_{hd} = 1 - P_{hd}$  and  $f_h = n_h/N_h$ .

370 By analogy with Särndal 10.3.15, (33) can also be expressed as:

$$AV(\tilde{y}_{s_d}) = \frac{1}{N_d^2} \sum_{h=1}^H \left( N_{hd}^2 \left( \frac{1}{n_{hd}^0} - \frac{1}{N_{hd}} \right) (Q_{hd}(\bar{y}_{\mathcal{U}_d} - \bar{y}_{hd})^2 + S_{hd}^2) \right) \quad (34)$$

371 where  $n_{hd}^0 = n_h \frac{N_{hd}}{N_h}$ .

372 By conditioning on the domain sample size, similarly to the development in §10.4, of  
 373 Särndal et al (1992), we get a closer approximation to  $V(\tilde{y}_{s_d})$

$$AV^*(\tilde{y}_{s_d}) = \frac{1}{N_d^2} \sum_{h=1}^H \left( N_{hd}^2 \left( \frac{1}{n_{hd}^0} - \frac{1}{N_{hd}} \right) \left( 1 + \frac{Q_{hd}}{n_{hd}^0} \right) (Q_{hd}(\bar{y}_{\mathcal{U}_d} - \bar{y}_{hd})^2 + S_{hd}^2) \right) \quad (35)$$

374 **C Optimum sample allocation for domain estimation under random**  
 375 **stratified sampling**

376 *Theorem* : The sample sizes  $n_1, \dots, n_h, \dots, n_H$  that minimize the  $V(\bar{y}_{ne_d})$  under a ran-  
 377 dom stratified sampling, subject to the constraint  $n_1 + \dots + n_h + \dots + n_H = n$  are  
 378 approximated by

$$n_h \approx \frac{W_{hd}S_{hd}/\sqrt{P_{hd}}}{\sum_{i=1}^H W_{id}S_{id}/\sqrt{P_{id}}} \quad (36)$$

379 *Proof* Under a random stratified sampling, neglecting the finite population correction  
 380  $1/N_{hd}$ , (19) can be written as

$$AV^*(\tilde{y}_d^{NG}) = \sum_{h=1}^H \frac{W_{hd}^2 S_{hd}^2 (n_h P_{hd} + Q_{hd})}{(n_h P_{hd})^2} = \sum_{h=1}^H \frac{W_{hd}^2 S_{hd}^2 (P_{hd}(n_h - 1) + 1)}{(n_h P_{hd})^2} \quad (37)$$

381 Where  $Q_{hd} = 1 - P_{hd}$  and  $W_{hd} = N_{hd}/N_d$ . Under the condition  $n_h \gg 0$ ,  $n_h - 1 \approx n_h$   
 382 and  $(n_h P_{hd} + 1)/n_h P_{hd} \approx 1$ . (37) therefore simplifies to

$$AV^*(\tilde{y}_d^{NG}) = \sum_{h=1}^H \frac{W_{hd}^2 S_{hd}^2}{n_h P_{hd}} \quad (38)$$

383 The minimum of this function can be found using the method of Lagrange multipliers.  
 384 The Lagrange function is:

$$L(n_1, \dots, n_h, \dots, n_H, \lambda) = \sum_{h=1}^H \frac{W_{hd}^2 S_{hd}^2}{n_h P_{hd}} + \lambda \left( \sum_{h=1}^H n_h - n \right) \quad (39)$$

385 For  $h = 1, \dots, h, \dots, H$ , where  $\lambda$  is the Lagrange multiplier. The partial derivatives of  
 386 this function are

$$\frac{\partial L}{\partial n_h} = -\frac{W_{hd}^2 S_{hd}^2}{n_h^2 P_{hd}} + \lambda \quad (40)$$

387 By setting the partial derivatives of this function equal to zero we obtain

$$n_h = \frac{1}{\sqrt[2]{\lambda}} \frac{W_{hd} S_{hd}}{\sqrt{P_{hd}}} \quad (41)$$

388 By summing these equations over  $h$ :

$$n \approx \frac{1}{\sqrt[2]{\lambda}} \sum_{h=1}^H \frac{W_{hd} S_{hd}}{\sqrt{P_{hd}}} \quad (42)$$

389 Thus,

$$\frac{1}{\sqrt[2]{\lambda}} \approx \frac{n}{\sum_{h=1}^H \frac{W_{hd} S_{hd}}{\sqrt{P_{hd}}}} \quad (43)$$

390 and

$$n_h \approx \frac{W_{hd} S_{hd} / \sqrt{P_{hd}}}{\sum_{i=1}^H W_{id} S_{id} / \sqrt{P_{id}}} \quad (44)$$

391

---

392 **References**

- 393 Bechtold WA, Patterson PL (2005) The Enhanced Forest Inventory and Analysis Program - National Sampling Design and Estimation Procedures. USDA Forest Service  
394 General Technical Report SRS-80:85
- 395 Bey A, Sánchez-Paus Díaz A, Maniatis D, Marchi G, Mollicone D, Ricci S, Bastin JF,  
396 Moore R, Federici S, Rezende M, Patriarca C, Turia R, Gamoga G, Abe H, Kaidong E,  
397 Miceli G (2016) Collect Earth: land use and land cover assessment through augmented  
398 visual interpretation. *Remote Sens-Basel* 8(10):807, DOI 10.3390/rs8100807
- 399 Chambers RL (2011) Which sample survey strategy? a review of three different ap-  
400 proaches. *Pak J Stat* 27(4):337–357
- 401 Cochran WG (1977) *Sampling Techniques* 3rd ed. Wiley publication in applied statistics,  
402 John Wiley & Sons: New York
- 403 Gregoire TG, Valentine HT (2008) *Sampling Strategies for Natural Resources and the*  
404 *Environment*. Chapman & Hall/CRC
- 405 Holt D, Smith TF (1979) Post stratification. *J R Stat Soc Ser A-G* 142(1):33–46, DOI  
406 10.2307/2344652
- 407 IPCC (2003) *Good Practice Guidance for Land Use, Land-Use Change and Forestry*.  
408 Institute for Global Environmental Strategies, Kanagawa
- 409 IPCC (2006) *Guidelines for National Greenhouse Gas Inventories*. Volume 4. Agriculture,  
410 Forestry and Other Land Use. Institute for Global Environmental Strategies,  
411 Kanagawa
- 412 Kish L (1980) Design and estimation for domains. *The Statistician* 29(4):209–222, DOI  
413 10.2307/2987728
- 414 Köhl M, Magnussen SS, Marchetti M (2006) *Sampling Methods, Remote Sensing and*  
415 *GIS Multiresource Forest Inventory*. Tropical Forestry, Springer Berlin Heidelberg,  
416 DOI 10.1007/978-3-540-32572-7
- 417 Lehtonen R, Pahkinen E (2004) *Practical methods for design and analysis of complex*  
418 *surveys*. John Wiley & Sons, DOI 10.1002/0470091649
- 419 Lohr SL (2009) *Sampling: Design and Analysis*. Advanced (Cengage Learning),  
420 Brooks/Cole Pub. Co.: Boston
- 421 Mandallaz D (2008) *Sampling Techniques for Forest Inventories*. Chapman & Hall/CRC  
422 Applied Environmental Statistics, Taylor & Francis, DOI 10.1201/9781584889779
- 423 Maniatis D, Mollicone D (2010) Options for sampling and stratification for national  
424 forest inventories to implement REDD+ under the UNFCCC. *Carbon Balance Manag*  
425 5(1):9, DOI 10.1186/1750-0680-5-9
- 426 McDonald TL (2003) Review of environmental monitoring methods: Survey  
427 designs. *Environmental Monitoring and Assessment* 85(3):277–292, DOI  
428 10.1023/A:1023954311636
- 429 Neyman J (1934) On the two different aspects of the representative method: the method  
430 of stratified sampling and the method of purposive selection. *J R Stat Soc* 97(4):558–  
431 625, DOI 10.2307/2342192
- 432 Pacificador Jr AY (1997) The sample mean under stratified random sampling. *Philipp*  
433 *Stat* 46:73–82
- 434 R Core Team (2016) *R: A Language and Environment for Statistical Computing*. R Foun-  
435 dation for Statistical Computing, Vienna, Austria, URL <https://www.R-project.org/>  
436

- 
- 437 Rao JN, Molina I (2015) Small Area Estimation. John Wiley & Sons, DOI  
438 10.1002/9781118735855
- 439 Revolution Analytics, Weston S (2015) doParallel: Foreach Parallel Adaptor for the 'par-  
440 allel' Package. URL <https://CRAN.R-project.org/package=doParallel>, r package ver-  
441 sion 1.0.10
- 442 Särndal CE, Lundström S (2005) Estimation in Surveys with Nonresponse. John Wiley  
443 & Sons, DOI 10.1002/0470011351
- 444 Särndal CE, Swensson B, Wretman J (1992) Model Assisted Survey Sampling. Springer-  
445 Verlag, DOI 10.1007/978-1-4612-4378-6
- 446 Schreuder H, Gregoire T, Wood G (1993) Sampling Methods for Multiresource Forest  
447 Inventory. Wiley
- 448 Schreuder HT, Ernst R, Ramírez-Maldonado H (2004) Statistical techniques for sampling  
449 and monitoring natural resources. USDA Forest Service General Technical Report  
450 RMRS-GTR-126
- 451 Schulz B, Bechtold W, Zarnoch S (2009) Sampling and estimation procedures for the  
452 vegetation diversity and structure indicator. General technical report PNW, U.S. Dept.  
453 of Agriculture, Forest Service, Pacific Northwest Research Station, Portland, OR
- 454 SEPAL (2016) System for Earth Observation Data Access, Processing and Analysis for  
455 Land Monitoring. URL <https://sepal.io>, accessed: 2017-04-14
- 456 Thompson SK (2012) Sampling. John Wiley & Sons, Hoboken, NJ 10, DOI  
457 10.1002/9781118162934
- 458 Tubiello F, Salvatore M, Córdor Golec R, Ferrara A, Rossi S, Biancalani R, Federici S,  
459 Jacobs H, Flammini A (2014) Agriculture, forestry and other land use emissions by  
460 sources and removals by sinks. FAO Statistics Division, Food and Agriculture Orga-  
461 nization, Rome ESS/14-02:89
